# Supplementary material
Source: PubMed Central journal article supplement (PMC6224673)
Supplement: mmc1.pdf [file mmc1.pdf]

**Biophysical Journal, Volume 115**

**Supplemental Information**

**Effect of an Intrinsically Disordered Plant Stress Protein on the Properties of Water**

**Luisa A. Ferreira, Alicyia Walczyk Mooradally, Boris Zaslavsky, Vladimir N. Uversky, and Steffen P. Graether**

## Supporting Material

**Table S1.** PD<sub>50</sub>, R<sub>h</sub> and d<sub>io</sub> of compounds used in the fit of eqn. 10.

| <b>Compound</b> | <b>PD<sub>50</sub> (μM)</b> | <b>R<sub>h</sub> (Å)</b> | <b>d<sub>io</sub></b> |
|-----------------|-----------------------------|--------------------------|-----------------------|
| K <sub>2</sub>  | 122.3                       | 18.90                    | 0.00                  |
| K <sub>4</sub>  | 61.2                        | 30.20                    | 3.35                  |
| K <sub>10</sub> | 26.6                        | 49.30                    | 9.81                  |
| PEG-1000        | 662.0                       | 7.48                     | 1.41                  |
| PEG-8000        | 24.0                        | 24.55                    | 1.33                  |
| PEG-10,000      | 33.2                        | 27.88                    | 2.01                  |

**Sequence of K<sub>2</sub> (Mr 5381.25)**

MKEKIKERIPGMGRKDEQKQTSATSTPGQGQQQKGMMEKIKEKLPGAH

**Sequence of K<sub>4</sub> (Mr 13144.04)**

MKEKIKERIPGMGRKDEQKQTSATSTPGQGQQQKGMMEKIKEKLPGAHLDRKDEQKQTSATSTP  
GGQMKEKIKERIPGMGRKDEQKQTSATSTPGQGQQQKGMMEKIKEKLPGAHLE

**Sequence of K<sub>10</sub> (Mr 35705.58)**

MKEKIKERIPGMGRKDEQKQTSATSTPGQGQQQKGMMEKIKEKLPGAHLDRKDEQKQTSATSTP  
GGQMKEKIKERIPGMGRKDEQKQTSATSTPGQGQQQKGMMEKIKEKLPGAHLDRKDEQKQTS  
TSTPGQGQMKEKIKERIPGMGRKDEQKQTSATSTPGQGQQQKGMMEKIKEKLPGAHLDRKDEQK  
QTSATSTPGQGQMKEKIKERIPGMGRKDEQKQTSATSTPGQGQQQKGMMEKIKEKLPGAHLDRK  
DEQKQTSATSTPGQGQMKEKIKERIPGMGRKDEQKQTSATSTPGQGQQQKGMMEKIKEKLPGAH  
LE

**Sequence of HSPB6 (Mr 17135.60)**

MEIPVPVQPSWLRRASAPLPGLSAPGRFLDQRFGEGLLEAELAALCPTTLAPYYLRAPSVALPV  
AQVPTDPGHFSVLLDVKHFSPEEIAVKVVGHEVHARHEERPDEHGFVAREFHRRYRLPPGVD  
PAAVTSALSPEGVLSIQAAPASAQAPPPAAAK

**Sequence of ELP (Mr 17063.21)**

MGH (GVGVP)<sub>40</sub>GWP

**Figure S1. Dehydrin and Control Protein Sequences**

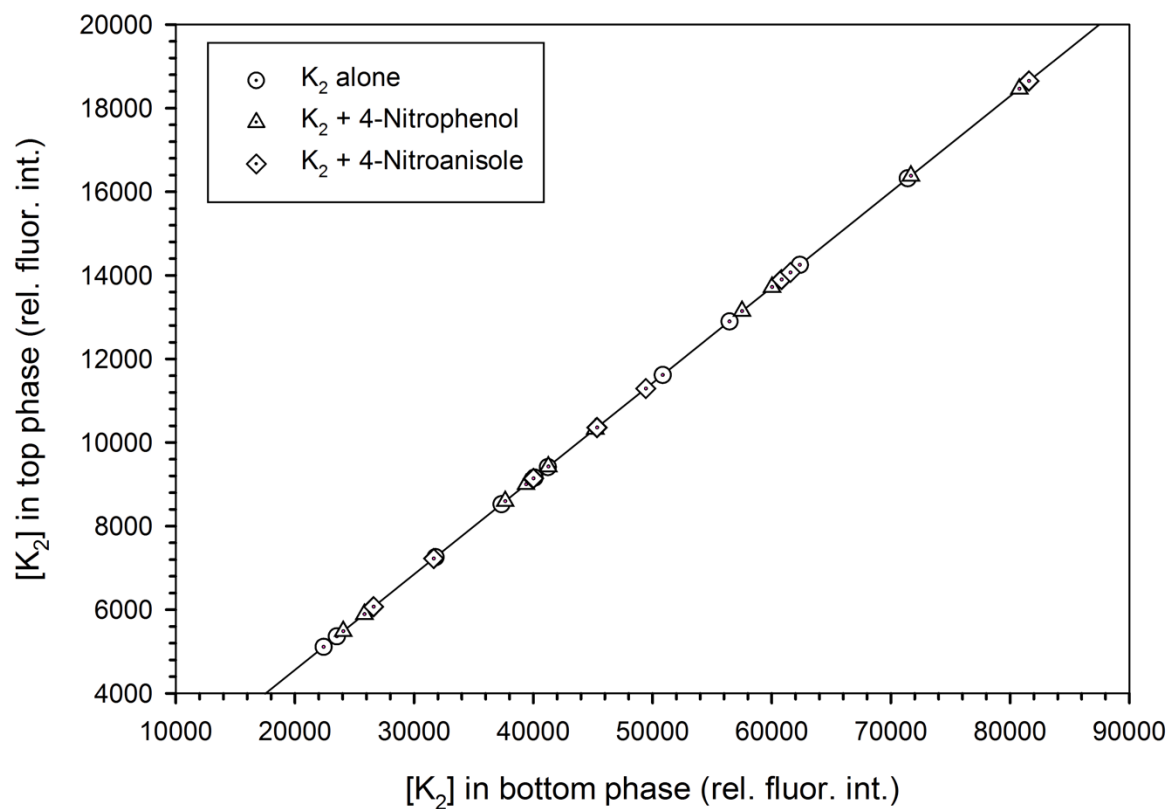

**Figure S2.** K<sub>2</sub> distribution is unaffected by the presence of the dyes. Partitioning of K<sub>2</sub> dehydrin in the presence and absence of 4-nitrophenol and 4-nitroanisole in the top and bottom phases of aqueous Ficoll-70/PEG-8000/0.01 M sodium phosphate buffer. The slope of the linear curve represents the partition coefficient of the K<sub>2</sub> dehydrin. K<sub>2</sub> alone, dotted circle; K<sub>2</sub> with 4-nitrophenol, dotted triangle; K<sub>2</sub> with 4-nitroanisole, dotted diamond.

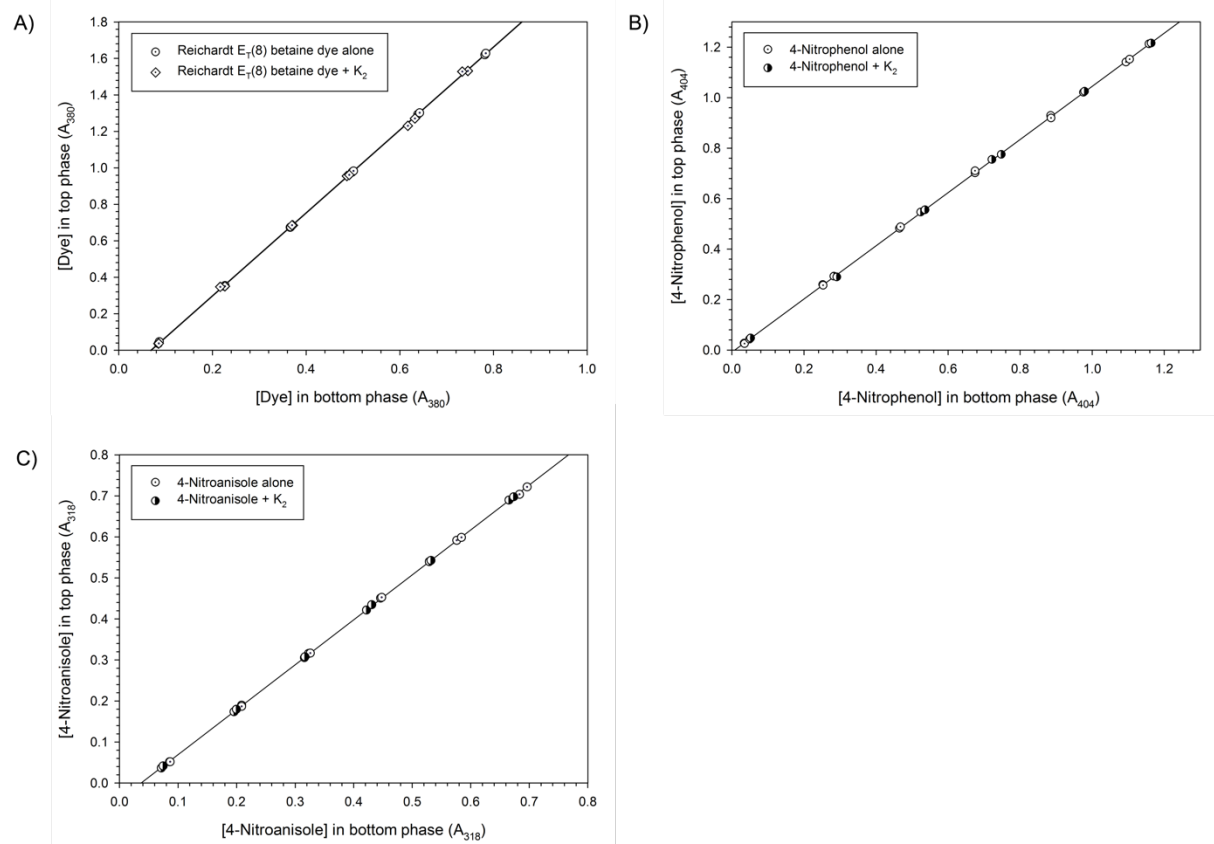

**Figure S3.** Dye distribution is unaffected by the presence of  $K_2$ . A) Concentration of the carboxylated Reichardt's betaine in the top and bottom phases of aqueous Ficoll-70/PEG-8000/0.01 M sodium phosphate buffer. B) Concentration of 4-nitrophenol in the top and bottom phases of aqueous Ficoll-70/PEG-8000/0.01 M sodium phosphate buffer. C) Concentration of 4-nitroanisole in the top and bottom phases of aqueous Ficoll-70/PEG-8000/0.01 M sodium phosphate buffer. The slopes of the linear curves represent the partition coefficient of each dye. The definition of the symbols is indicated in each panel.
